# Supplementary material
Source: publisher site journal article supplement (https://www.dovepress.com/article/392680)
Supplement: Supplementary file 1 [file get_supplementary_file.php]

# Supplement 1

***This questionnaire must be made to the head of the dwelling. The head of the dwelling is the habitual resident recognized as such by the other members of his home***

| 1. **SOCIODEMOGRAPHIC INFORMATION** | | | | |
| --- | --- | --- | --- | --- |
| Home code: | Hemodialysis patient code: | | Household contact code: | |
| Participant name: | | | | ID: |
| Parent or responsible adult ( *only in case of minors):* | | | |  |
| 1. Patient Type: Adult  Pediatric | | | | |
| 1. Relationship to patient: Mother  Dad  Son  Spouse  Other  Which: _____________ | | | | |
| 1. Sex: Male  Female | | 1. Date of birth *( according to CC or TI)* : DD___/MM___/YYYY____ | | |
| 1. Approximate date since live in the neighborhood DD___/MM___/YYYY____ | | | | |
| 1. Educational level : None  Primary  Secondary  Technical or technological  Graduate   In case of technique, technology or profession, what did you study? __________________________________________ | | | | |
| 1. Site or place of main occupation (currently): (*In case you are unemployed, indicate only the place of permanence)* : Municipality ________________ Commune: ___________________ Neighborhood: ____________________ | | | | |

| 1. **KNOWLEDGE, ATTITUDES AND PRACTICES (KAP) SURVEY** |
| --- |
| **Knowledge about antibiotic use and antimicrobial resistance:**   1. Have you heard about antibiotics? YES  NO   If the previous answer is affirmative, which antibiotics do you know? _______________________________  ____________________ ____________________ _____________________ ______________________ |
| 1. Who taught you about antibiotics?   College/school  Internet  Doctor  Pharmacist  Family  Friends  On TV and radio  Other  Which one: ____________ |
| 1. When should antibiotics be used?  | When get flu | When get pain in the body | | --- | --- | | When get gastritis | When get tonsillitis | | When get dengue | When get pain to urinate | | When get headache | When get an infected wound | | When get a sore throat  When get fever | Does not know | |  | Other reason  Which: ___________ | |
| 1. When do you decide to see the doctor? (*You can select multiple answers)*   When present something strange that had not happened before  When start to feel sick  When feel very sick  Other  Which one:_________________ |
| 1. What can antibiotics cure?   Fever  Headache  Muscle and bone pain  Bladder infections  Weakness and tiredness  Vomiting and diarrhea  Does not know  Other reason  Which: ___________________ |
| 1. Do you know why antibiotics are used in agriculture, poultry industry or in livestock?   YES  NO  Does not know  If the answer is yes, what are antibiotics used for?a  __________________________________________________________________________________________________________________________________________________________________________________________ |
| 1. Have you heard about antimicrobial resistance? YES  NO   If the previous answer is affirmative, what have you heard about antimicrobial resistance?a  __________________________________________________________________________________________________________________________________________________________________________________________ |
| 1. If you take antibiotics every time you get sick, what can it do to you? (*You can select multiple answers)*   Absolutely nothing  It relieves us of the disease quickly  The antibiotic will not help us against future infections  It will always keep us healthy  Does not know  Other  Which one: _______________________ |
| 1. Do antibiotics have harmful effects? YES  NO   *If the answer is affirmative:*  What is the main harmful effect of taking antibiotics?a  __________________________________________________________________________________________________________________________________________________________________________________________ |
| 1. Should children receive antibiotics whenever there is a fever?   YES  NO Does not know |
| 1. Do you think antibiotics can stop working? YES  NO |
| 1. Do you know how often a new antibiotic is developed? Every:   Every Month  Every 6 months  Every year  Every 3 years  Every 5 years  There has not been in the last 10 years  Does not know |
| 1. Do you think infections can be transmitted between people and pets? YES  NO  Does not know   If the previous answer is affirmative, which infections can be transmitted?a  ____________________________________________________________________________________________ |
| **Attitudes on the use of antibiotics and antimicrobial resistance:**   1. Where do you go if have a fever or suspected infection?   Pharmacy  Hospital  Neighborhood medical center  Where a family member  HPC  Nowhere  Other  Which: _______________ |
| 1. When you are given a treatment for several days, do you take all the pills that the doctor prescribes?   YES  NO |
| 1. When you are given a treatment for several days, do you stop the medication when you get better? YES  NO |
| 1. Do you keep medications in your home? YES  NO   *If the previous answer is affirmative, the interviewer should look at the medicines to check if there is storage of antibiotics:*  Antibiotics in home: ______________________________________________________________________ |
| 1. Do you agree to keep antibiotics in the house for any infection?YES  NO |
| 1. Are there people in the neighborhood who prescribe antibiotics for any illness? YES  NO  Does not know |
| 1. Do you take the medications that the pharmacist recommends? YES  NO  Does not recommend anything |
| **Practices on the antibiotics use and antimicrobial resistance:**   1. Does anyone in your family prescribe medications such as antibiotics?   YES  NO Does not know  If the previous answer is affirmative, who prescribes the medication in the family?  Father  Mother  Sibling(s ) Uncle(s)  Cousin(s ) |
| 1. Who has prescribed antibiotics to you? (*You can select multiple answers)*   Doctor  Pharmacist  Friends  Relatives  Myself  Other  Which one: _____________ |
| 1. Why have you been prescribed antibiotics? ( *You can select multiple answers)*   Tonsillitis  Diarrhea  Flu  Urinary infection  Earache  Does not remember  Other  Which one: _________ |
| 1. When was the last time you took antibiotics? Does not remember  At the moment  Last month   In the last 6 months  Last year  Over a year ago  Never |
| 1. What is the name of the antibiotic you have used the most? ____________________________________________ |
| 1. Where do you get the antibiotics?   In pharmacy  From the home medicine cabinet  In a chain store  The HPC gives them  Other  Which: __________________________________ |

a Questions that were taken into account for content analysis

| **INFORMATION ABOUT INTERVIEWER** |
| --- |
| NAME OF INTERVIEWER: ______________________________________________  Date: DD_____/MM_____/YYYY______ |
